# Supplementary material for: Microwave Imaging of Voids in Oil Palm Trunk Applying UWB Antenna and Robust Time-Reversal Algorithm
Source: Hindawi journal article supplement (doi:10.1155/2020/8895737), 2020-10-12
Supplement: f1 [file 8895737.f1.docx]

**Supplementary materials**

1. **Hybrid and Passive Microwave Imaging**

Because unhealthy cells usually absorb higher energy compare with normal tissue they expand more. This expansion causes pressure waves. Using a focused ultrasound transducer these waves can be detected [33]. During the eighty’s hybrid microwave-induced acoustic imaging techniques were introduced. These methods work on a similar principle as that of passive microwave imaging. This time, microwaves are used to selectively heat the target’s cells. Once the tumor cells absorb this heat they expand, and any generated acoustic waves are detected with the aid of an array of ultrasound transducers. Hybrid microwave imaging works on the property that malignant tissues have higher conductivity properties than healthy cells and hence absorb more microwave energy. This results in the generation of stronger acoustic/pressure waves. These induced acoustic signals are then sensed by ultra-sensors.

1. **DA and DI algorithm comparison**

Table 1: DA and DI algorithm comparison

| DA | | | DI | | |
| --- | --- | --- | --- | --- | --- |
|  | Advantages | Disadvantages |  | Advantages | Disadvantages |
| SCB | - Robust - Needs less power to constrain distortion |  | DAS | - Simple - Quick | - Lower quality - Incapable of detecting CVA |
| APES | - Suppresses interference from antennas and dielectric scatter |  | CROSS-CORRELATED | - Better FWHM - Higher SCR (+10 dB) - Improved localization and detection | - Works well only for short range - Smeared image |
| RCB | - Better results with MAMI, not just monostatic - Based on dielectric contrast - Better results with heterogeneous tissue |  | IDAS | - New weighting factor (QF) - Excellent image reconstruction - Good quality | - time consuming - Energy at target is skewed |
| TR-MUSIC | - High resolution - Quick | - Doesn’t need phase compensation | MIST | - High quality image - Better artifact removal | - False alarms during detection |
| TR | - High accuracy - High quality image - No need for entire data set from sample | - Complicated | DMAS | - Better clutter removal - Better detection and localization | - Low level of noise repression |
| EEMD | - Superior to non-linear data - Decomposes complex signals - Clutter rejection |  | F-DMAS | - High resolution - Higher dynamic range - Better image quality than DMAS | - More time consuming compared to DAS, DMAS |

1. **TOA calculations**

Figure.6 (in the main transcript) shows how a wave travels into a medium to define the hollow response exists between () and () times. This schematic and the distance notations are shown only for one (Tx) and (Rx) and then they are extended for all other 14 receivers in the system. All the distances from Tx toward Rx, the trunk and the hollow are presented and defined in Figure. 6 (in the main transcript). Afterward, time delay constants associated with each distance are calculated as follow:

d4= d3cos θ, t0 = d0/c, t1 = d1/c, t2 = d2/c

t3 = d3/, t4 = d4/, t5 = d5/c (12)

where is the phase velocity of the electromagnetic (EM) wave. () and () intervals are determined as

= ,

(13)

Where and are known as the initial time delay and the input pulse duration, respectively [59].

1. **Radiation Characteristics of the Antenna Sensor at the presence of Cylindrical Sample**

Figure. 1 depicts the simulation’s setup of 16 sensors around the sample.


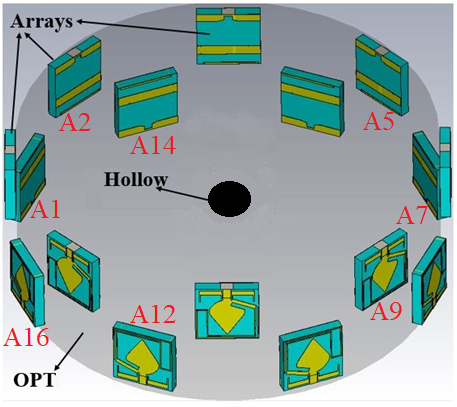


Figure 1: Antenna array applied to simulated OPT sample


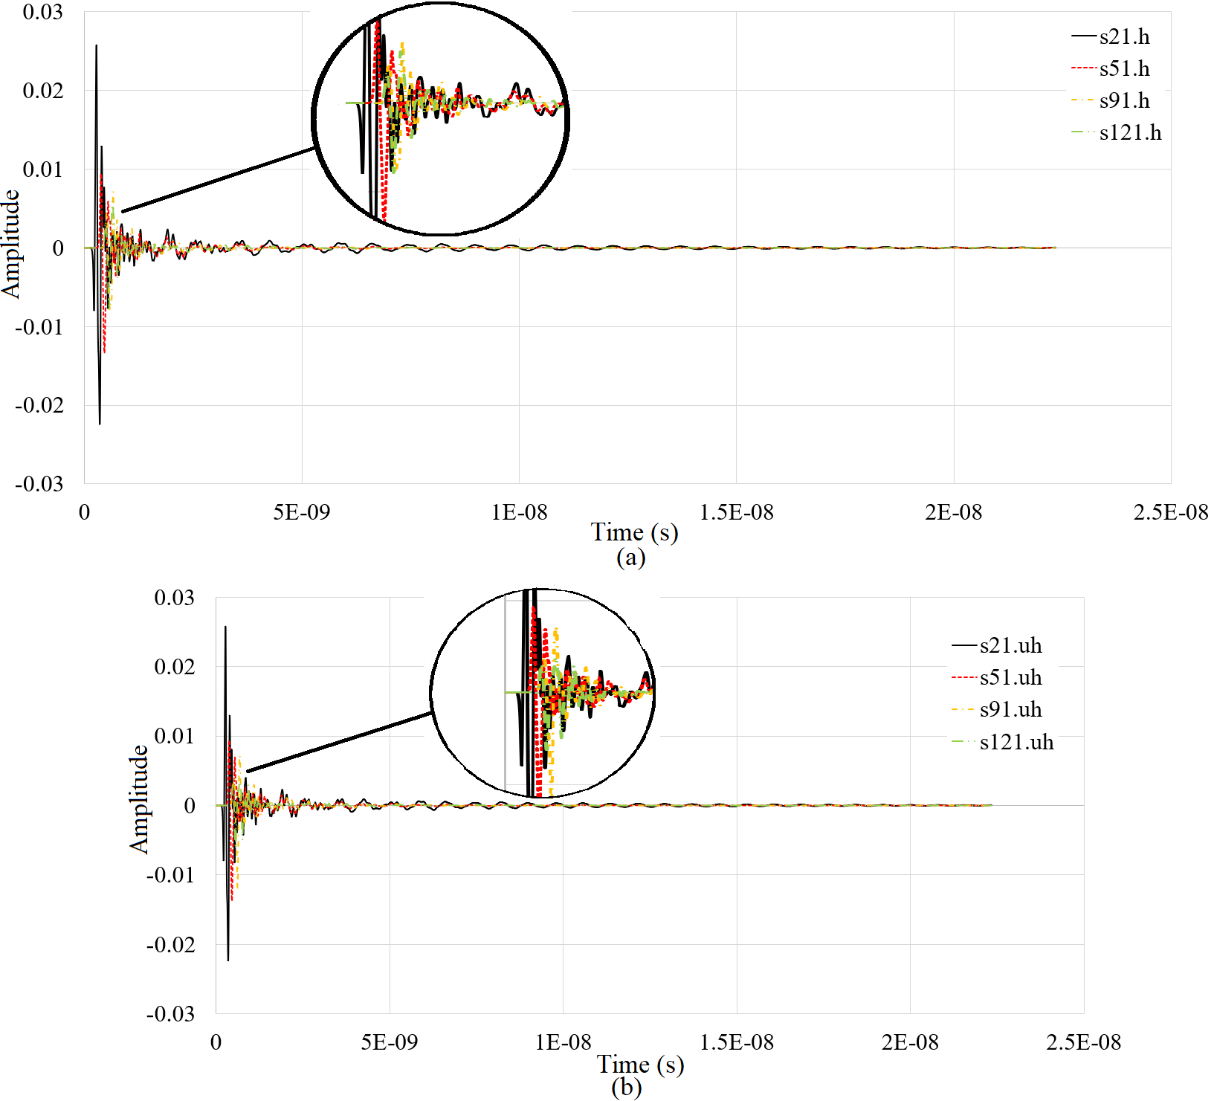


Figure 2: Different signals from four different arrays: (a) healthy (h); (b) unhealthy (uh) OPT

A1 transmits a UWB pulse and while other sensors receive the signal. Figure. 2 shows a graph of received signals from four different sensors (A2, A5, A9, A12) from simulated healthy and unhealthy samples. It shows that the signals were shifted when the hollow exists. Arrays were placed in different positions to show how distance and angle affect signal reception (Figure. 1). Besides, signals arriving at receivers are delayed, which shifts signal peaks. Thus, signals have the same shape but with amplitude changes that are specific for each array position. To show signal similarity and low distortion, a fidelity factor (FF) is therefore useful. Figure. 3 shows >90% similarity in FFs for healthy and unhealthy samples. The equations below show the fidelity formula [60].

(14)

,

is the shifted time*, F* has assumed as the maximum cross-correlation function of two signals when they have normalized to their level energy. Fidelity varies between 0 ≤ 𝐹 ≤ 1, which zero shows there is no similarity between the two signals, and one shows both signals are 100% similar.

Note that the unhealthy sample’s FF is less than healthy FF in some arrays. This is due to a hollow’s different dielectric properties.


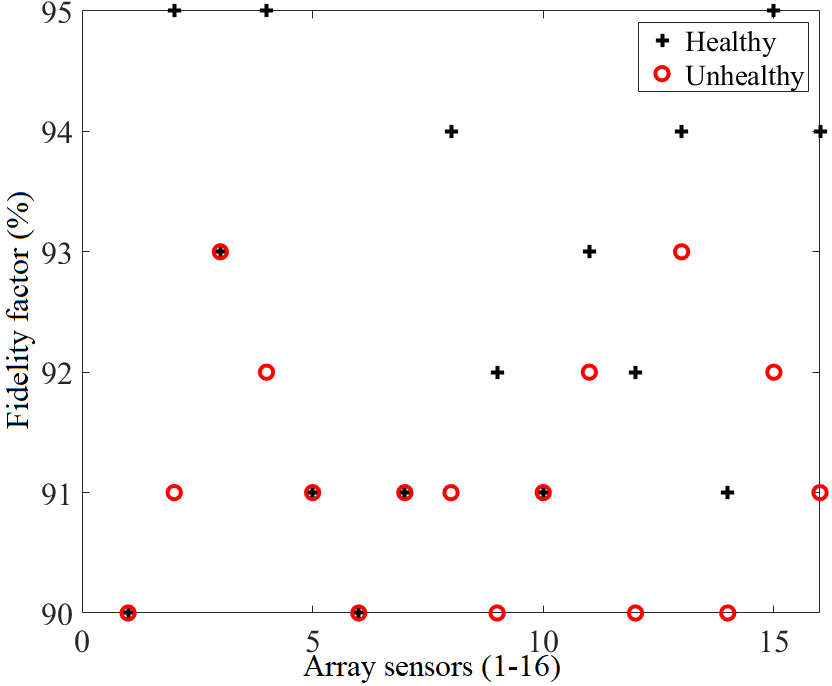


Figure 3: Fidelity as a percentage of received signals for healthy and unhealthy xylem


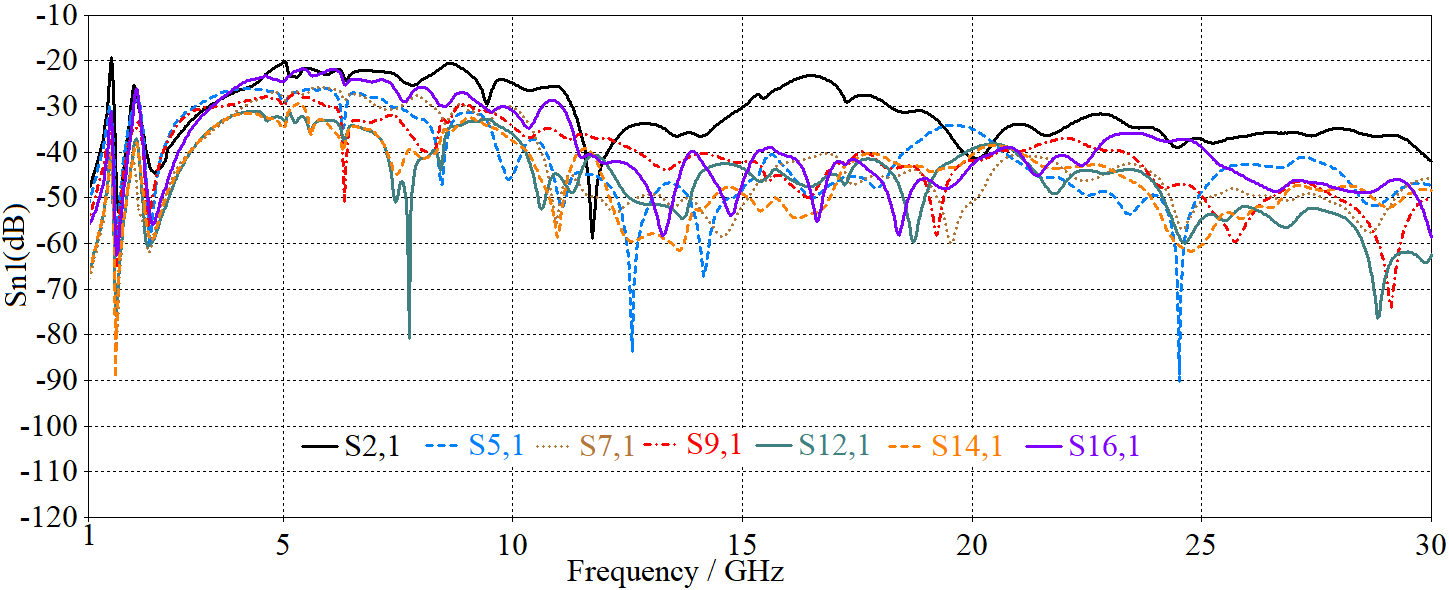


Figure 4: Transmission coefficient results for seven different arrays of unhealthy samples

Another factor affecting a cylindrical array is the coupling between sensors. Figure. 4 illustrates seven coupling effects from seven different array arrangements. Good coupling outcomes are less than -20 dB.

1. **Resolution Calculation**

One of the important factors in imaging is the resolution that system can achieve. Three types of resolution exist called range resolution, cross-range resolution, and spatial resolution [61], [62], [63]. The range resolution () is inversely proportional to the effective bandwidth of the pulse.

(1)

Where c is the speed of light. On the other hand, the cross-range resolution () is independent of range and wavelength, and the resolution is better with smaller real antenna length.

(2)

Where is , R is the distance between the scatterer and the radar, and is the real array length ( is calculated at center frequency of the antenna 12.5 GHz).

In addition, if the effective rank (r) determines the reconstructed image dimension or the total equidistant points in the imaging zone while considering for image reconstruction, the spatial resolution (D) can be calculated over the imaging zone as:

D = (3)

Where is the imaging plane (100 × 100 mm2) and *r* is the dimension of reconstructed image area by finding the equidistance points in that area. Using above equations 1-, the range, cross-range and spatial resolution are 5.5 mm, 7.5 mm, and 3.5 mm. Besides the calculation methods of the spatial resolution is performed based on singular value decomposition [64].
